# Supplementary material for: Neurocognition of Aged Patients With Chronic Tinnitus: Focus on Mild Cognitive Impairment
Source: PubMed Central journal article supplement — Clin Exp Otorhinolaryngol. 2019 May 14;13(1):8–14. doi: 10.21053/ceo.2018.01914 (PMC7010500; doi:10.21053/ceo.2018.01914), 2019-05-14
Supplement: ceo-2018-01914-suppl.pdf [file ceo-2018-01914-suppl.pdf]

Supplementary Table 1. An individualized profile in each subject

| Patient No. | Laterality | Age (yr) | Sex    | Mean PTA | Tinnitus onset (yr) | MCI | K-IADL | MoCA-K | K-PHQ-9 | THI | Awareness | Annoyance | Loudness | Effect of life | Tinnitus pitch (kHz) | Tinnitus loudness (dB) |
|-------------|------------|----------|--------|----------|---------------------|-----|--------|--------|---------|-----|-----------|-----------|----------|----------------|----------------------|------------------------|
| 1           | 2          | 78       | Female | 38.75    | 1.0                 | 1   | 8      | 12     | 6       | 48  | 3         | 3         | 3        | 3              | 0.125                | 75                     |
| 2           | 1          | 65       | Male   | 38.75    | 1.0                 | 1   | 14     | 16     | 23      | 48  | 5         | 5         | 9        | 5              | 0.125                | 40                     |
| 3           | 3          | 74       | Female | 36.25    | 4.0                 | 1   | 8      | 17     | 6       | 32  | 8         | 9         | 7        | 4              | 1                    | 30                     |
| 4           | 3          | 77       | Female | 33.75    | 2.0                 | 1   | 8      | 18     | 1       | 24  | 10        | 5         | 2        | 1              | 8                    | 62                     |
| 5           | 2          | 72       | Female | 18.75    | 1.0                 | 1   | 8      | 19     | 5       | 48  | 10        | 7         | 5        | 3              | 8                    | 43                     |
| 6           | 3          | 75       | Female | 37.5     | 8.0                 | 1   | 8      | 21     | 13      | 28  | 3         | 5         | 10       | 3              | 8                    | 98                     |
| 7           | 3          | 65       | Female | 32.5     | 10.0                | 1   | 8      | 21     | 0       | 28  | 10        | 10        | 7        | 5              | 3                    | 56                     |
| 8           | 3          | 65       | Male   | 21.25    | 2.0                 | 1   | 8      | 21     | 1       | 24  | 7         | 2         | 5        | 0              | 4                    | 63                     |
| 9           | 2          | 82       | Female | 40       | 0.5                 | 1   | 8      | 22     | 0       | 32  | 2         | 2         | 2        | 1              | 0.250                | 64                     |
| 10          | 3          | 56       | Female | 32.5     | 10.0                | 1   | 8      | 22     | 4       | 24  | 5         | 2         | 2        | 0              | 8                    | 68                     |
| 11          | 1          | 77       | Female | 27.5     | 0.6                 | 0   | 8      | 23     | 2       | 36  | 10        | 2         | 2        | 0              | 0.125                | 35                     |
| 12          | 1          | 65       | Female | 18.75    | 10.0                | 0   | 9      | 23     | 5       | 42  | 5         | 5         | 2        | 5              | 8                    | 36                     |
| 13          | 2          | 65       | Male   | 36.25    | 3.0                 | 0   | 8      | 23     | 9       | 32  | 5         | 5         | 5        | 5              | Failed               | Failed                 |
| 14          | 3          | 65       | Male   | 27.5     | 1.0                 | 0   | 8      | 23     | 9       | 32  | 5         | 5         | 5        | 5              | 8                    | 45                     |
| 15          | 2          | 65       | Female | 32.5     | 1.0                 | 0   | 8      | 23     | 0       | 18  | 7         | 7         | 7        | 7              | 8                    | 40                     |
| 16          | 2          | 69       | Female | 40       | 5.0                 | 0   | 14     | 23     | 26      | 24  | 9         | 10        | 10       | 10             | 4                    | 73                     |
| 17          | 3          | 65       | Female | 20       | 3.0                 | 0   | 9      | 23     | 6       | 30  | 2         | 7         | 8        | 5              | 6                    | 25                     |
| 18          | 3          | 60       | Female | 11.25    | 2.0                 | 0   | 8      | 24     | 4       | 18  | 2         | 2         | 4        | 2              | Failed               | Failed                 |
| 19          | 1          | 65       | Female | 35       | 0.8                 | 0   | 9      | 24     | 0       | 36  | 3         | 1         | 5        | 2              | 4                    | 25                     |
| 20          | 3          | 70       | Female | 35       | 1.0                 | 0   | 13     | 24     | 10      | 36  | 5         | 1         | 2        | 1              | Failed               | Failed                 |
| 21          | 3          | 69       | Male   | 35       | 2.0                 | 0   | 5      | 24     | 0       | 16  | 10        | 5         | 4        | 1              | 6                    | 60                     |
| 22          | 2          | 65       | Female | 20       | 3.0                 | 0   | 8      | 25     | 1       | 24  | 9         | 3         | 0        | 3              | Failed               | Failed                 |
| 23          | 2          | 65       | Female | 27.5     | 0.8                 | 0   | 8      | 25     | 2       | 18  | 8         | 8         | 5        | 5              | 4                    | 41                     |
| 24          | 3          | 69       | Male   | 37.5     | 0.5                 | 0   | 9      | 25     | 0       | 10  | 9         | 0         | 5        | 1              | Failed               | Failed                 |
| 25          | 3          | 70       | Female | 17.5     | 0.5                 | 0   | 8      | 25     | 1       | 12  | 2         | 2         | 2        | 2              | Failed               | Failed                 |
| 26          | 1          | 65       | Male   | 26.25    | 1.0                 | 0   | 5      | 26     | 2       | 20  | 10        | 5         | 5        | 0              | Failed               | Failed                 |
| 27          | 1          | 65       | Male   | 3.75     | 0.9                 | 0   | 8      | 26     | 1       | 14  | 3         | 2         | 3        | 1              | Failed               | Failed                 |
| 28          | 2          | 67       | Female | 27.5     | 0.6                 | 0   | 12     | 26     | 4       | 24  | 10        | 10        | 8        | 10             | 8                    | 74                     |
| 29          | 3          | 67       | Female | 23.75    | 10.0                | 0   | 8      | 26     | 7       | 32  | 10        | 6         | 10       | 8              | 8                    | 63                     |
| 30          | 3          | 65       | Female | 20       | 1.0                 | 0   | 8      | 26     | 7       | 34  | 7         | 7         | 8        | 5              | 8                    | 54                     |
| 31          | 3          | 65       | Male   | 25       | 5.0                 | 0   | 6      | 26     | 3       | 22  | 1         | 3         | 3        | 2              | 1                    | 17                     |
| 32          | 2          | 65       | Male   | 37.5     | 3.0                 | 0   | 8      | 26     | 0       | 20  | 3         | 3         | 3        | 3              | 6                    | 66                     |
| 33          | 1          | 65       | Female | 23.75    | 5.0                 | 0   | 11     | 26     | 11      | 18  | 2         | 2         | 3        | 0              | Failed               | Failed                 |
| 34          | 3          | 73       | Male   | 15       | 7.0                 | 0   | 6      | 26     | 2       | 30  | 10        | 5         | 0        | 0              | 0.125                | 16                     |
| 35          | 3          | 70       | Female | 20       | 5.0                 | 0   | 8      | 27     | 13      | 34  | 3         | 3         | 5        | 0              | Failed               | Failed                 |
| 36          | 2          | 65       | Female | 21.25    | 10.0                | 0   | 8      | 27     | 3       | 32  | 10        | 7         | 6        | 5              | 8                    | 73                     |
| 37          | 1          | 65       | Female | 6.25     | 1.0                 | 0   | 8      | 27     | 0       | 24  | 8         | 1         | 2        | 1              | 4                    | 8                      |
| 38          | 2          | 65       | Male   | 32.5     | 10.0                | 0   | 8      | 27     | 3       | 40  | 6         | 7         | 7        | 5              | Failed               | Failed                 |

(Continued to the next page)

Supplementary Table 1. Continued

| Patient No. | Laterality | Age (yr) | Sex    | Mean PTA | Tinnitus onset (yr) | MCI | K-IADL | MoCA-K | K-PHQ-9 | THI | Awareness | Annoyance | Loudness | Effect of life | Tinnitus pitch (kHz) | Tinnitus loudness (dB) |
|-------------|------------|----------|--------|----------|---------------------|-----|--------|--------|---------|-----|-----------|-----------|----------|----------------|----------------------|------------------------|
| 39          | 2          | 81       | Female | 31.25    | 2.0                 | 0   | 8      | 27     | 2       | 10  | 3         | 2         | 2        | 1              | 8                    | 86                     |
| 40          | 3          | 76       | Female | 37.5     | 8.0                 | 0   | 8      | 27     | 2       | 18  | 3         | 3         | 3        | 3              | 8                    | 50                     |
| 41          | 3          | 74       | Male   | 36.25    | 0.5                 | 0   | 11     | 27     | 1       | 16  | 10        | 0         | 5        | 0              | Failed               | Failed                 |
| 42          | 3          | 72       | Male   | 40       | 2.0                 | 0   | 8      | 27     | 0       | 2   | 4         | 9         | 5        | 10             | Failed               | Failed                 |
| 43          | 3          | 66       | Female | 13.75    | 1.0                 | 0   | 8      | 27     | 9       | 12  | 6         | 4         | 3        | 3              | 8                    | 46                     |
| 44          | 3          | 65       | Male   | 21.25    | 0.5                 | 0   | 5      | 27     | 4       | 24  | 5         | 3         | 5        | 3              | 8                    | 60                     |
| 45          | 3          | 65       | Male   | 25       | 1.0                 | 0   | 7      | 27     | 0       | 20  | 3         | 5         | 3        | 0              | 8                    | 48                     |
| 46          | 2          | 65       | Female | 18.75    | 0.3                 | 0   | 8      | 27     | 2       | 32  | 1         | 1         | 1        | 0              | Failed               | Failed                 |
| 47          | 1          | 68       | Male   | 38.75    | 20.0                | 0   | 5      | 28     | 9       | 18  | 5         | 6         | 6        | 6              | 3                    | 52                     |
| 48          | 2          | 65       | Male   | 17.5     | 1.0                 | 0   | 8      | 28     | 5       | 32  | 4         | 5         | 7        | 3              | Failed               | Failed                 |
| 49          | 2          | 65       | Female | 23.75    | 5.0                 | 0   | 8      | 28     | 5       | 34  | 10        | 9         | 9        | 8              | 2                    | 38                     |
| 50          | 1          | 65       | Male   | 33.75    | 3.0                 | 0   | 9      | 28     | 0       | 12  | 9         | 1         | 6        | 0              | Failed               | Failed                 |
| 51          | 3          | 72       | Female | 20       | 10.0                | 0   | 8      | 28     | 1       | 14  | 7         | 3         | 5        | 1              | Failed               | Failed                 |
| 52          | 3          | 73       | Male   | 31.25    | 2.0                 | 0   | 8      | 28     | 4       | 12  | 5         | 2         | 2        | 6              | 0.125                | 44                     |
| 53          | 3          | 65       | Male   | 23.75    | 5.0                 | 0   | 5      | 28     | 0       | 6   | 4         | 4         | 5        | 4              | 4                    | 45                     |
| 54          | 3          | 65       | Male   | 27.5     | 0.8                 | 0   | 5      | 28     | 2       | 4   | 5         | 1         | 3        | 1              | 8                    | 65                     |
| 55          | 3          | 62       | Female | 21.25    | 5.5                 | 0   | 8      | 28     | 0       | 14  | 9         | 2         | 5        | 1              | Failed               | Failed                 |
| 56          | 2          | 65       | Male   | 21.25    | 1.0                 | 0   | 8      | 29     | 3       | 22  | 9         | 4         | 5        | 4              | 2                    | 26                     |
| 57          | 3          | 71       | Female | 20       | 4.0                 | 0   | 8      | 29     | 4       | 16  | 1         | 2         | 1        | 1              | 0.125                | 30                     |
| 58          | 1          | 72       | Female | 28.75    | 1.0                 | 0   | 8      | 29     | 1       | 6   | 2         | 1         | 2        | 0              | 8                    | 56                     |

PTA, pure-tone audiometry; MCI, mild cognitive impairment; K-IADL, Korean version of the Lawton instrumental activities of daily living scale; MoCA-K, Korean version of the Montreal cognitive assessment; K-PHQ-9, Korean version of the patient health questionnaire-9; THI, tinnitus handicap inventory.
